# Supplementary material
Source: Royal Society of Chemistry journal article supplement (doi:10.1039/d5cp04715c)
Supplement: d5cp04715c1.pdf [file d5cp04715c1.pdf]

### Rational design, molecular characterization and dissociation mechanisms of PROTACs targeting hFAAH

Yuxin Xiao<sup>1#</sup>, Na Li<sup>2#</sup>, Dazhi Cheng<sup>1</sup>, Yan Cheng<sup>2</sup>, Huaichuan Duan<sup>2</sup>, Yuting Song<sup>2</sup>, Xinmin Wang<sup>2</sup>, Zuoxin Ou<sup>1</sup>, Ting Luo<sup>2</sup>, Hubing Shi<sup>2\*</sup>, Jianping Hu<sup>1\*</sup>

<sup>1</sup> Key Laboratory of Medicinal and Edible Plants Resources Development of Sichuan Education Department, School of Pharmacy, Chengdu University, Chengdu, China.

<sup>2</sup> Institute of Breast Health Medicine, State Key Laboratory of Biotherapy, West China Hospital, Sichuan University and Collaborative Innovation Center, Chengdu, China.

<sup>#</sup> These authors contributed equally to this work.

\* For correspondence: Hubing Shi, shihb@scu.edu.cn; Jianping Hu, hjpgcdu@163.com

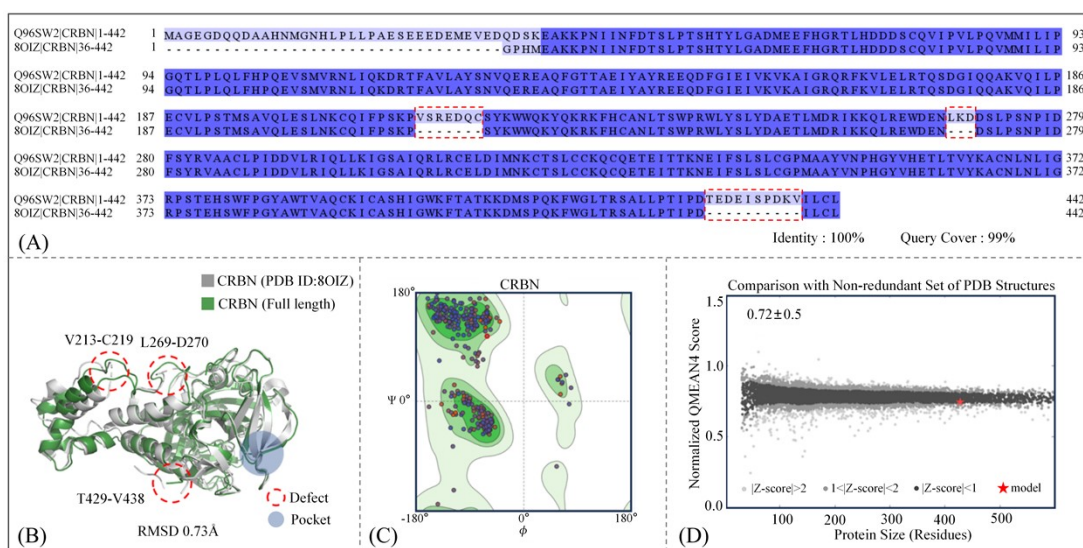

**Figure S1.** Residue complementation and structural rationalization validation for CRBN. (A) The sequence of CRBN (PDB ID: 8OIZ) was aligned against the UniProt entry Q96SW2; (B) superimposition of CRBN crystal structure with the template protein, respectively shown in green and gray; ramachandran plot (C) and QMEAN Z-score distribution (D) for the completed CRBN structure.

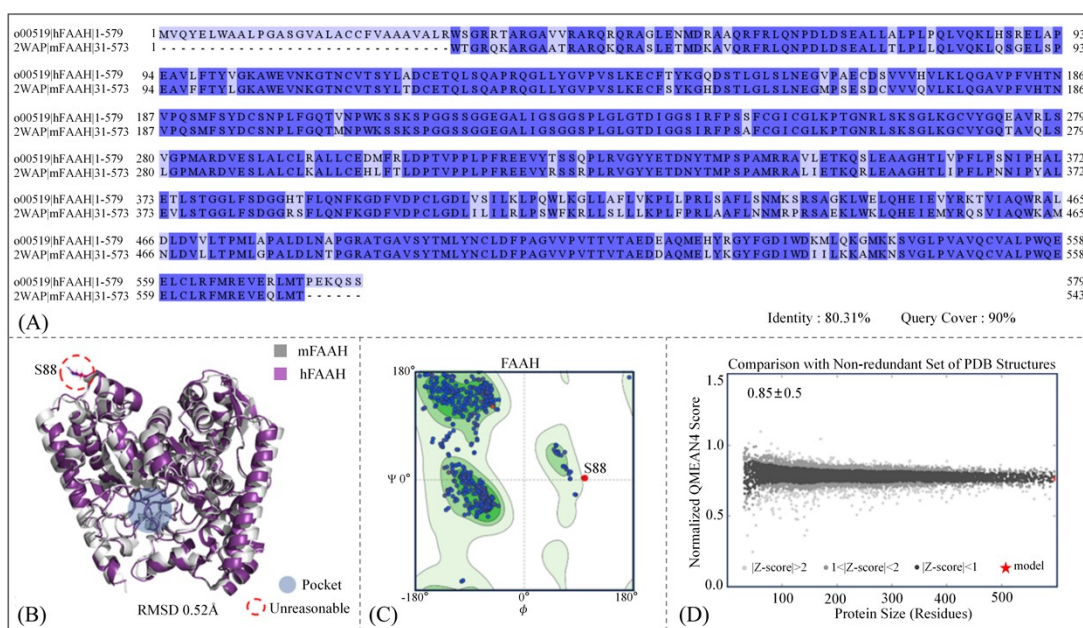

**Figure S2.** Homology modeling and structural rationalization verification for hFAAH. (A) Sequence alignment between mouse mFAAH (PDB ID: 2WAP) and human hFAAH (UniProt entry: O00519); (B) superimposition of the template mFAAH and the modeled hFAAH, respectively shown in purple and gray; Ramachandran plot (C) and QMEAN Z-score distribution (D) for the modeled hFAAH structure.

**Table S1:** Amber ff99SB force field parameters for the cosolvents used.

| Solvent name and formula                                                                                       | Atom name                                                                                           | atom type | Charge  |
|----------------------------------------------------------------------------------------------------------------|-----------------------------------------------------------------------------------------------------|-----------|---------|
| DMSO - Dimethyl sulfoxide<br>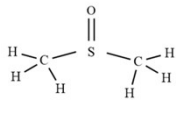 | C1                                                                                                  | CT        | -0.0354 |
|                                                                                                                | C2                                                                                                  | CT        | -0.0354 |
|                                                                                                                | S                                                                                                   | S         | +0.1317 |
|                                                                                                                | O1                                                                                                  | OS        | -0.4281 |
|                                                                                                                | H1                                                                                                  | HC        | +0.0612 |
|                                                                                                                | H2                                                                                                  | HC        | +0.0612 |
|                                                                                                                | H3                                                                                                  | HC        | +0.0612 |
|                                                                                                                | H4                                                                                                  | HC        | +0.0612 |
|                                                                                                                | H5                                                                                                  | HC        | +0.0612 |
|                                                                                                                | H6                                                                                                  | HC        | +0.0612 |
|                                                                                                                | EtOH - Ethanol<br> | C1        | CT      |
| C2                                                                                                             |                                                                                                     | CT        | +0.5193 |
| O1                                                                                                             |                                                                                                     | OH        | -0.7114 |
| H1                                                                                                             |                                                                                                     | HO        | +0.4147 |
| H2                                                                                                             |                                                                                                     | HI        | -0.0822 |
| H3                                                                                                             |                                                                                                     | HI        | -0.0822 |
| H4                                                                                                             |                                                                                                     | HC        | +0.0640 |
| H5                                                                                                             |                                                                                                     | HC        | +0.0640 |
| H6                                                                                                             |                                                                                                     | HC        | +0.0640 |

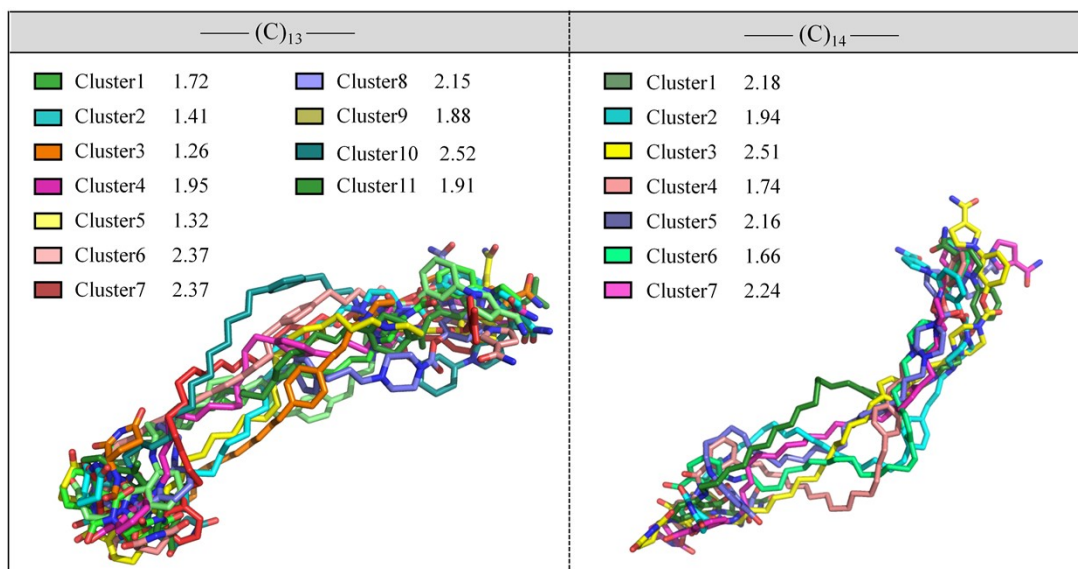

**Figure S3.** The representative conformational clusters and their minimum core RMSD values

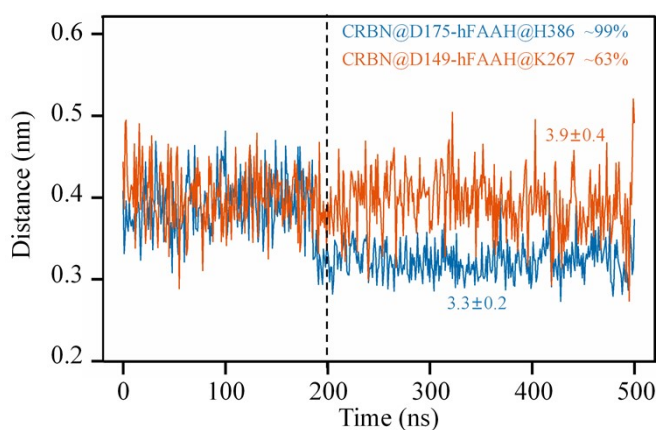

**Figure S4.** Time evolution of the salt-bridge distance between hFAAH and CRBN in two systems

**Table S2:** Statistics on interfacial water

| Interface statistic                             | hFAAH_CRB     | hFAAH_C13p_CRB |
|-------------------------------------------------|---------------|----------------|
|                                                 | N             | N              |
| Interface area BSA ( $\text{\AA}^2$ )           | $808 \pm 276$ | $1056 \pm 301$ |
| Number of interface water <sup>a</sup>          |               |                |
| Range                                           | 3-19          | 4-23           |
| Mean                                            | 11.0          | 12.9           |
| Per 1000 $\text{\AA}^2$ of BSA                  | 13.6          | 12.2           |
| Number of water mediated H-bonds <sup>b</sup>   |               |                |
| Range                                           | 5-27          | 8-26           |
| Mean                                            | 10.3          | 14.1           |
| Per 1000 $\text{\AA}^2$ of BSA                  | 12.7          | 13.4           |
| Number of bridging water molecules <sup>c</sup> |               |                |
| Range                                           | 0-11          | 0-15           |
| Mean                                            | 3.2           | 5.2            |
| Per 1000 $\text{\AA}^2$ of BSA                  | 4.0           | 4.9            |

<sup>a</sup>Water molecules  $\leq 4.5$   $\text{\AA}$  from interface atoms of both the subunits.

<sup>b</sup>H-bonds between interface waters and interface protein atoms.

<sup>c</sup>Interface waters making H-bonds with both interacting subunits

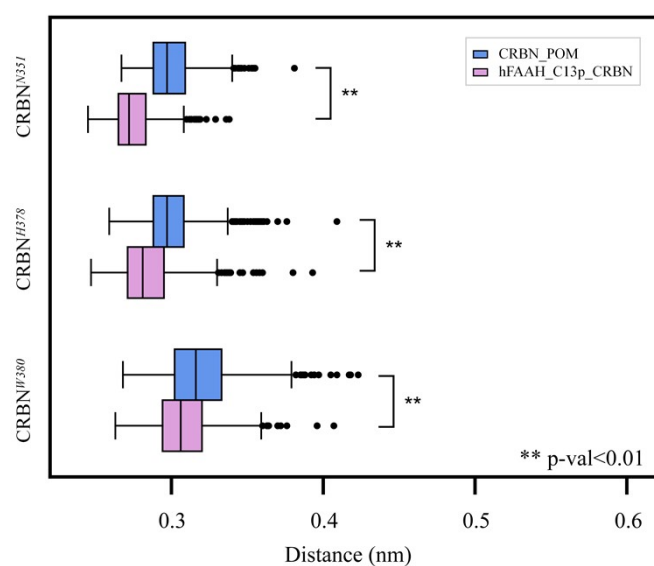

**Figure S5.** Distance distributions of the three key H-bonds in CRBN\_POM and hFAAH\_C13p\_CRBN. The data were obtained from the equilibrium stage (200–500 ns) of cMD simulations for each system; Welch's t-test indicates that the differences are statistically significant.

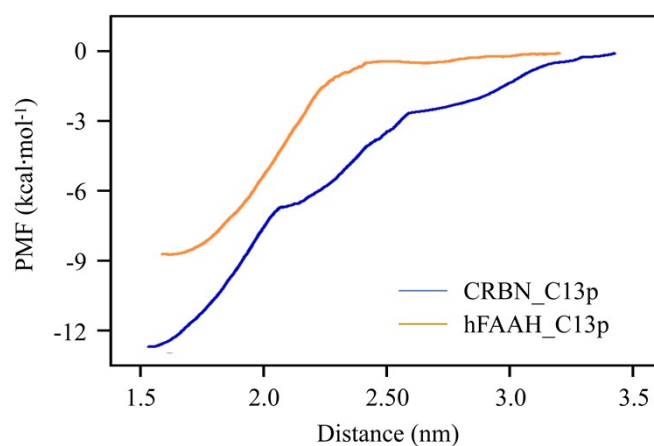

**Figure S6.** PMF curves for the dissociation of C13p from the CRBN\_C13p and hFAAH\_C13p systems.
